# Supplementary material for: Variation of presence/absence genes among Arabidopsis populations
Source: PubMed Central journal article supplement (PMC3433342; doi:10.1186/1471-2148-12-86), 2012-06-14
Supplement: 1471-2148-12-86-S1.pdf [file 1471-2148-12-86-S1.pdf]

**Table S2.** The genotyping results.

| Gene name | Na | Col | Agu | Bak | Bak | Dog | Fei | HKT | ICE | ICE | ICE | ICE | ICE | ICE | Kast | Koc | Lag | Lerik | Mer | Ne  | Ped | Sha | Tue  | Walh | Xan | Yeg   | Valid |
|-----------|----|-----|-----|-----|-----|-----|-----|-----|-----|-----|-----|-----|-----|-----|------|-----|-----|-------|-----|-----|-----|-----|------|------|-----|-------|-------|
|           |    |     | -1  | -2  | -7  | -4  | 0   | 24  | 120 | 153 | 163 | 169 | 21  | 212 | el-1 | h-1 | 22  | 1-3   | -6  | mru | 0   |     | acsB | -1   | -1  | ation |       |
| AT1G07470 | 1  | 1/1 | 1/1 | -   | -   | 1/1 | 1/1 | 1/1 | -   | -   | -   | -   | -   | -   | -    | 0/1 | -   | -     | -   | 1/1 | 1/1 | -   | -    | 1/1  | -   | -     | F     |
| AT1G34650 | 1  | 1/1 | -   | -   | -   | 1/1 | 1/1 | 1/1 | -   | -   | -   | -   | -   | -   | 1/1  | 1/1 | 0/0 | -     | -   | -   | -   | -   | 1/1  | -    | -   | -     | T     |
| AT1G65250 | 1  | 1/1 | -   | -   | -   | 1/1 | 1/1 | -   | 1/1 | 1/1 | -   | -   | -   | -   | -    | -   | 0/1 | -     | -   | -   | 1/1 | -   | -    | -    | 1/1 | 1/1   | F     |
| AT2G16810 | 1  | 1/1 | 1/1 | 1/1 | 1/1 | 1/1 | -   | -   | -   | -   | -   | 1/1 | 1/1 | -   | -    | -   | -   | -     | -   | -   | -   | 0/0 | -    | -    | -   | -     | T     |
| AT2G19550 | 1  | 1/1 | -   | -   | -   | 1/1 | 1/1 | 1/1 | -   | -   | -   | -   | -   | -   | 1/1  | 0/0 | 1/1 | -     | -   | -   | -   | -   | 1/1  | -    | -   | -     | T     |
| AT2G43930 | 1  | 1/1 | -   | -   | -   | 1/1 | 1/1 | -   | 0/1 | 1/1 | -   | -   | -   | -   | -    | -   | -   | -     | -   | -   | 1/1 | -   | -    | -    | 1/1 | 1/1   | F     |
| AT2G45930 | 1  | 1/1 | -   | 1/1 | -   | 1/1 | 1/1 | 1/1 | -   | -   | 1/1 | -   | -   | -   | -    | -   | 1/1 | -     | -   | -   | -   | -   | 1/1  | -    | -   | 0/0   | T     |
| AT3G04854 | 1  | 1/1 | 1/1 | 0/0 | -   | -   | -   | -   | -   | -   | -   | -   | 1/1 | -   | -    | -   | -   | 1/1   | 1/1 | -   | 1/1 | -   | -    | 1/1  | -   | -     | T     |
| AT3G05155 | 1  | 1/1 | 1/1 | 1/1 | 1/1 | 1/1 | -   | -   | -   | -   | 0/1 | 1/1 | -   | -   | -    | -   | -   | -     | -   | -   | -   | 1/1 | -    | -    | -   | -     | F     |
| AT3G47090 | 1  | 1/1 | -   | 1/1 | -   | 1/1 | 1/1 | 1/1 | -   | 1/1 | -   | -   | -   | -   | 0/1  | 1/1 | 1/1 | -     | -   | -   | 1/1 | -   | 1/1  | -    | -   | -     | F     |
| AT3G59190 | 1  | 1/1 | -   | 1/1 | -   | 1/1 | 1/1 | 1/1 | -   | -   | 0/0 | -   | -   | -   | -    | -   | 1/1 | -     | -   | -   | -   | -   | 1/1  | -    | -   | 1/1   | T     |
| AT4G02850 | 1  | 1/1 | 1/1 | -   | -   | 1/1 | 1/1 | 1/1 | -   | -   | -   | -   | -   | -   | -    | -   | 1/1 | -     | -   | -   | 1/1 | 0/0 | -    | 1/1  | -   | -     | T     |
| AT4G24974 | 1  | 1/1 | 1/1 | 1/1 | 1/1 | -   | -   | -   | 1/1 | -   | 1/1 | -   | -   | 1/1 | -    | 1/1 | -   | 0/0   | -   | 1/1 | -   | 1/1 | 1/1  | 1/1  | -   | -     | T     |
| AT5G17720 | 1  | 1/1 | -   | 1/1 | -   | 1/1 | 0/0 | 1/1 | -   | -   | -   | -   | -   | -   | -    | -   | 1/1 | -     | -   | -   | -   | -   | -    | -    | -   | -     | T     |
| AT5G37520 | 1  | 1/1 | 0/0 | 1/1 | 1/1 | 1/1 | -   | -   | -   | -   | 1/1 | 1/1 | -   | -   | -    | -   | -   | -     | -   | -   | -   | 1/1 | -    | -    | -   | -     | T     |
| AT5G53670 | 1  | 1/1 | 1/1 | -   | -   | 1/1 | 1/1 | 1/1 | -   | -   | -   | -   | -   | -   | -    | -   | 1/1 | -     | -   | -   | 1/1 | 0/0 | -    | 1/1  | -   | -     | T     |
| AT5G56640 | 1  | 1/1 | 1/1 | -   | -   | -   | -   | -   | 1/1 | -   | -   | 1/1 | -   | -   | -    | -   | 0/0 | -     | -   | -   | -   | -   | -    | 1/1  | 1/1 | -     | T     |
| AT1G03940 | 2  | 1/1 | -   | 1/1 | 1/1 | 0/1 | -   | 1/1 | -   | -   | -   | -   | -   | -   | -    | 1/1 | -   | 1/1   | -   | 0/1 | -   | -   | -    | -    | -   | -     | F     |
| AT1G21870 | 2  | 1/1 | -   | 0/0 | 0/0 | -   | -   | 1/1 | -   | -   | -   | 1/1 | -   | -   | -    | -   | 1/1 | -     | 1/1 | 1/1 | 1/1 | -   | 1/1  | -    | -   | -     | T     |
| AT1G80700 | 2  | 1/1 | -   | -   | 0/1 | 1/1 | -   | -   | 1/1 | -   | -   | -   | -   | -   | -    | -   | -   | 1/1   | 1/1 | -   | 0/1 | -   | -    | -    | -   | 1/1   | F     |
| AT3G25880 | 2  | 1/1 | -   | -   | 1/1 | 1/1 | -   | -   | 0/0 | -   | -   | -   | -   | -   | -    | -   | 0/0 | 1/1   | -   | 1/1 | -   | -   | -    | -    | -   | 1/1   | T     |
| AT4G10060 | 2  | 1/1 | -   | -   | 1/1 | 1/1 | -   | -   | 1/1 | -   | -   | -   | -   | -   | -    | -   | 1/1 | 0/0   | -   | 1/1 | -   | -   | -    | -    | -   | 0/0   | T     |
| AT4G35165 | 2  | 1/1 | -   | -   | 1/1 | -   | -   | 1/1 | -   | -   | -   | -   | -   | -   | -    | -   | 1/1 | 1/1   | -   | 1/1 | 0/0 | -   | 1/1  | -    | 0/0 | -     | T     |
| AT5G42350 | 2  | 1/1 | -   | 1/1 | 1/1 | -   | -   | 1/1 | -   | -   | -   | -   | -   | -   | -    | -   | 1/1 | -     | 1/1 | 0/1 | -   | 0/1 | -    | 1/1  | -   | -     | F     |
| AT5G48175 | 2  | 1/1 | -   | 1/1 | 1/1 | -   | -   | 1/1 | -   | -   | 0/1 | -   | -   | -   | -    | -   | -   | 1/1   | -   | -   | -   | -   | -    | 1/1  | 1/1 | -     | F     |
| AT2G23985 | 3  | 1/1 | 0/0 | 1/1 | 0/0 | -   | 1/1 | -   | -   | -   | -   | -   | -   | -   | -    | -   | -   | -     | 0/0 | -   | -   | -   | 1/1  | -    | 1/1 | -     | T     |
| AT2G01360 | 4  | 1/1 | -   | -   | 0/0 | -   | -   | -   | 1/1 | 1/1 | -   | 1/1 | 1/1 | 1/1 | 1/1  | 1/1 | -   | 1/1   | 1/1 | -   | -   | -   | -    | 1/1  | 1/1 | 0/0   | T     |
| AT4G29710 | 4  | 1/1 | -   | 1/1 | 1/1 | -   | -   | -   | 1/1 | -   | -   | -   | -   | -   | -    | -   | 1/1 | 1/1   | 1/1 | 1/1 | 1/1 | 1/1 | 1/1  | 0/0  | 1/1 | 1/1   | T     |
| AT5G65050 | 4  | 1/1 | -   | -   | -   | -   | -   | -   | 1/1 | -   | -   | -   | -   | -   | 1/1  | -   | -   | 1/1   | 1/1 | 1/1 | 1/1 | 0/0 | -    | -    | -   | 1/1   | T     |
| AT4G06490 | 5  | 1/1 | 1/1 | -   | -   | -   | -   | -   | 1/1 | 1/1 | -   | 1/1 | 1/1 | 1/1 | 1/1  | 0/0 | 1/1 | -     | -   | -   | -   | 1/1 | 1/1  | -    | 1/1 | -     | T     |
| AT5G38670 | 6  | 1/1 | -   | -   | 1/1 | -   | 1/1 | -   | -   | 1/1 | -   | 1/1 | 1/1 | 1/1 | 1/1  | -   | 1/1 | 1/1   | -   | 1/1 | -   | 0/0 | 1/1  | 1/1  | 1/1 | 1/1   | T     |
| AT1G52440 | 13 | 1/1 | -   | -   | -   | -   | -   | -   | 1/1 | 0/0 | -   | 1/1 | -   | 0/0 | -    | -   | -   | 1/1   | 1/1 | 1/1 | 1/1 | 1/1 | 0/0  | 1/1  | 0/0 | 1/1   | T     |
| AT2G29920 | 15 | 1/1 | -   | 1/1 | 1/1 | -   | -   | 1/1 | 1/1 | 1/1 | -   | 0/0 | 1/1 | 0/0 | -    | -   | -   | 1/1   | 0/0 | -   | -   | -   | -    | -    | -   | 0/0   | T     |
| AT5G26912 | 15 | 1/1 | -   | -   | 1/1 | -   | 1/1 | 1/1 | -   | 1/1 | -   | 1/1 | 0/0 | -   | 1/1  | 0/0 | -   | -     | -   | 1/1 | -   | -   | 0/0  | -    | 1/1 | -     | T     |
| AT2G28426 | 18 | 1/1 | 1/1 | -   | 1/1 | -   | 1/1 | 0/1 | -   | 1/1 | -   | 1/1 | -   | 1/1 | -    | 1/1 | 1/1 | 1/1   | -   | N   | -   | 0/1 | -    | -    | -   | 0/1   | F     |
| AT4G38280 | 19 | 1/1 | -   | -   | -   | 0/0 | -   | -   | 0/0 | -   | -   | -   | -   | -   | 0/0  | -   | -   | 0/0   | -   | -   | -   | -   | 1/1  | -    | 1/1 | 1/1   | T     |
| AT5G18880 | 26 | 1/1 | 0/0 | -   | 0/0 | -   | 0/0 | 0/0 | -   | 1/1 | -   | 0/0 | 1/1 | 1/1 | -    | 1/1 | 0/0 | 1/1   | 1/0 | -   | 0/0 | -   | -    | 0/0  | 1/1 | -     | T     |
| AT1G02590 | 31 | 1/1 | 0/0 | -   | -   | -   | -   | -   | 1/1 | 0/0 | -   | -   | 1/1 | 1/1 | -    | 1/1 | -   | 1/1   | 1/1 | 0/0 | 0/0 | -   | -    | -    | -   | -     | T     |
| AT3G11060 | 31 | 1/1 | 0/0 | 1/1 | 1/1 | -   | -   | -   | 0/0 | -   | -   | -   | 1/1 | -   | -    | -   | 1/1 | -     | -   | 1/1 | -   | 1/1 | 0/0  | -    | 1/1 | 0/0   | T     |
| AT2G24617 | 36 | 1/1 | -   | -   | -   | -   | -   | -   | -   | 0/0 | -   | -   | -   | -   | 0/0  | -   | -   | 0/0   | 0/0 | -   | -   | -   | 0/0  | 0/0  | -   | -     | T     |
| AT5G18010 | 40 | 1/1 | 0/0 | -   | -   | 0/0 | -   | -   | 0/0 | -   | -   | 0/0 | -   | -   | -    | -   | -   | -     | -   | -   | 0/0 | -   | 1/1  | -    | -   | -     | T     |
| AT5G26270 | 48 | 1/1 | -   | -   | 0/0 | -   | 0/0 | 0/0 | 1/1 | -   | -   | -   | -   | -   | 0/0  | 0/0 | -   | -     | -   | -   | -   | 0/0 | -    | 0/0  | 0/0 | -     | T     |
| AT5G26950 | 56 | 1/1 | -   | -   | -   | -   | 1/1 | -   | -   | 1/1 | -   | -   | 0/0 | -   | 1/0  | -   | -   | -     | -   | -   | 1/1 | 0/0 | -    | 0/0  | -   | -     | T     |
| AT1G59920 | 63 | 1/1 | -   | -   | 0/1 | -   | 0/1 | 0/1 | -   | 0/1 | -   | 0/1 | 1/1 | 1/1 | -    | 0/1 | 0/1 | -     | -   | -   | -   | 0/1 | 1/1  | -    | 0/1 | 0/1   | F     |
| AT1G43680 | 1  | 1/1 | -   | 1/1 | 1/1 | 1/1 | 1/1 | 1/1 | 1/1 | 1/1 | -   | -   | -   | -   | 1/1  | -   | 1/1 | -     | -   | -   | N   | -   | -    | -    | -   | 1/1   | U     |
| AT2G34320 | 1  | 1/1 | -   | 1/1 | 1/1 | 1/1 | 1/1 | 1/1 | 1/1 | N   | -   | -   | -   | -   | 1/1  | -   | 1/1 | -     | -   | -   | 1/1 | -   | -    | -    | 1/1 | 1/1   | U     |
| AT5G56690 | 1  | 1/1 | -   | 1/1 | 1/1 | 1/1 | 1/1 | N   | -   | 1/1 | 1/1 | -   | -   | -   | -    | -   | 1/1 | -     | -   | -   | 1/1 | -   | 1/1  | -    | -   | 1/1   | U     |
| AT1G05740 | 2  | 1/1 | -   | 1/1 | 1/1 | -   | 1/1 | -   | 1/1 | -   | 1/1 | -   | -   | -   | 1/1  | -   | -   | 1/1   | 1/1 | 1/1 | 1/1 | N   | 1/1  | -    | -   | 1/1   | U     |
| AT1G47497 | 2  | 1/1 | -   | N   | N   | 1/1 | -   | 1/1 | -   | -   | -   | -   | -   | -   | -    | -   | 1/1 | 1/1   | 1/1 | -   | 1/1 | -   | -    | -    | -   | -     | U     |
| AT4G18540 | 2  | 1/1 | -   | N   | N   | -   | -   | 1/1 | -   | -   | -   | -   | -   | -   | -    | -   | -   | 1/1   | 1/1 | -   | 1/1 | -   | 1/1  | 1/1  | -   | -     | U     |
| AT4G01535 | 10 | 1/1 | -   | -   | 1/1 | -   | N   | -   | -   | 1/1 | 1/1 | 1/1 | -   | -   | 1/1  | -   | 1/1 | -     | -   | -   | N   | -   | -    | 1/1  | -   | 1/1   | U     |
| AT1G48390 | 11 | 1/1 | -   | 1/1 | 1/1 | -   | -   | -   | -   | N   | -   | -   | 1/1 | -   | 1/1  | -   | 1/1 | 1/1   | 1/1 | -   | -   | N   | 1/1  | -    | 1/1 | 1/1   | U     |
| AT4G09430 | 20 | 1/1 | -   | -   | -   | -   | -   | N   | -   | -   | -   | 1/1 | 1/1 | -   | -    | 1/1 | N   | 1/1   | -   | 1/1 | N   | -   | N    | N    | -   | -     | U     |

Na is the number of absent accessions. The number (1 or 0) before ‘/’ represents the expected P/A pattern, while the one after ‘/’ represents the observed results. ‘1’ means presence and ‘0’ means absence. ‘N’ means no product and ‘-’ means have not been genotyped. In the ‘Validation’ column, ‘T’ is short for true, ‘F’ is false, and ‘U’ is ‘uncertain’ because the absent genes have no genotyping products.
