# Supplementary material for: Variation of presence/absence genes among Arabidopsis populations
Source: PubMed Central journal article supplement (PMC3433342; doi:10.1186/1471-2148-12-86), 2012-06-14
Supplement: 1471-2148-12-86-S2.pdf [file 1471-2148-12-86-S2.pdf]

**Table S4.** Primer information for the PCR amplification of P/A genes in Table S2.

| Gene name | primers (5'-3')      | Forward or reverse | Length of P contig | Length of A contig |
|-----------|----------------------|--------------------|--------------------|--------------------|
| AT1G07470 | AATGGATCAGGTGAAGTCAA | F                  |                    |                    |
|           | TGGATGGAACTCACAACTT  | R                  | ~1900bp            | ~1000bp            |
|           | GAACTCCTCACGAACTTTGT | R                  | ~500bp             |                    |
| AT1G34650 | CCGCCATCACTCTAATCA   | F                  |                    |                    |
|           | CGTTTGCATCAGTCTTCA   | R                  | ~5400bp            | ~2600bp            |
|           | ACGGGTCAAGTTTGTTCA   | F                  | ~1200bp            |                    |
| AT1G65250 | TCTCGAATCCTTTGCTCA   | F                  |                    |                    |
|           | AGGCTACTCGGATGTTGT   | R                  | ~1800bp            | ~570bp             |
|           | TCCACCAGCCAACATCTT   | R                  | ~300bp             |                    |
| AT2G16810 | TCTTACCATTCACTCGGA   | F                  |                    |                    |
|           | GACCGTCATCACTCTTCA   | R                  | ~1000bp            | ~500bp             |
|           | CCCACCACTAGACA ACTT  | R                  | ~400bp             |                    |
| AT2G19550 | CTACCAGCCTGAAAGACA   | F                  |                    |                    |
|           | ATGGATCTGGACGAGGTT   | R                  | ~1800bp            | ~900bp             |
|           | ACCAAGACTGCGATTGTT   | R                  | ~400bp             |                    |
| AT2G43930 | TCAGGAGCAAGTTCGTTA   | F                  |                    |                    |
|           | TGATGTGGCACCGTTAGT   | R                  | ~2500bp            | ~1300bp            |
|           | TCAGGCCGAGTTTGTTAT   | F                  | ~400bp             |                    |
| AT2G45930 | AATGAGCTTGCCTTGACA   | F                  |                    |                    |
|           | CCACCAGCCTCGACTTAA   | R                  | ~1400bp            | ~300bp             |
|           | AGGATTTGAGTTGCGGTT   | R                  | ~700bp             |                    |
| AT3G04190 | GTATACCGGAGAGCTCGTGA | F                  |                    |                    |
|           | GCAACATCGCTTAATCCACA | R                  | ~1300bp            | ~800bp             |
|           | AATAGGTAATGCGTTTTTCG | R                  | ~600bp             |                    |
| AT3G04854 | ACTATGCCGAGCTTTGAA   | F                  |                    |                    |
|           | ATGCTTCCTATGGCTACA   | R                  | ~1400bp            | ~1000bp            |
|           | CCTCGTAGTCTCCGGTTA   | F                  | ~700bp             |                    |
| AT3G05155 | AGGTCAACCCGTCTATAT   | F                  |                    |                    |
|           | CGTTCACAAAGTATCAGA   | R                  | ~2400bp            | ~900bp             |
|           | GAGTGCAGGATTAGGTTA   | F                  | ~360bp             |                    |
| AT3G47090 | CGTCTGGAGCAATGCCTT   | F                  |                    |                    |
|           | CAGCAGCTTTGAACGTGT   | R                  | ~2900bp            | ~1100bp            |
|           | CATGCAAATCCCAACCCT   | R                  | ~700bp             |                    |
| AT3G59190 | CGATTGCATGAACCCTAA   | F                  |                    |                    |
|           | CGTAATGGAGTCCCTGAA   | R                  | ~1600bp            | ~490bp             |
|           | GATGGGAGTATGCAATGT   | F                  | ~750bp             |                    |
| AT4G02850 | TGCCAAACATACATCACTCA | F                  |                    |                    |
|           | TGCTTGCTTCCACTTGATTA | R                  | ~1700bp            | ~1000bp            |
|           | TCAACAGACCAAATCATCGT | R                  | ~790bp             |                    |

|           |                      |   |         |            |
|-----------|----------------------|---|---------|------------|
| AT4G24974 | ACGGCAACTGAATCACTT   | F |         |            |
|           | GGTTTAGCATCCCATCTT   | R | ~1500bp | ~600bp     |
|           | CGGAAAATATCTACCCAA   | F | ~100bp  |            |
| AT5G17720 | TCCTCCCTCGTAAACTGA   | F |         |            |
|           | TTGACAATCTTGGCGTTA   | R | ~3100bp | ~300bp     |
|           | GTGCTTACAACATGCGAT   | R | ~1000bp |            |
| AT5G37520 | ATCTCCGTGCAGTCATCT   | F |         |            |
|           | AGGCATTTGTCAAGACCA   | R | ~2300bp | ~900bp     |
|           | TATGAAACCGAGGGAGTA   | F | ~250bp  |            |
| AT5G53670 | GTGCCTCTACGATATGGTCT | F |         |            |
|           | GAAAGTCGAACAATCTGAGC | R | ~1600bp | ~600bp     |
|           | GAAAAGGATAGCGTCAGATA | R | ~300bp  |            |
| AT5G56640 | GGCTTAACCTTCTCGACA   | F |         |            |
|           | TCGTCTCCTAAACCATCA   | R | ~2000bp | ~600bp     |
|           | TAGCATTGCACAAGGCTG   | R | ~200bp  |            |
| AT1G03940 | TACCCGCGCTTCTGAGAT   | F |         |            |
|           | TTGGCAGGTATGGTATCC   | R | ~2600bp | ~1300bp    |
|           | GACGCCATGCAACACACT   | F | ~950bp  |            |
| AT1G21870 | GCATTGCCACATTCCTAA   | F |         |            |
|           | GCGGTAAATTCAGCAACA   | R | ~2100bp | ~1000bp    |
|           | TCCAACAATAGGCACCAA   | R | ~600bp  |            |
| AT1G80700 | CGCTATCTGATCGAACCA   | F |         |            |
|           | GAATCCATTGCCATCCTT   | R | ~1700bp | ~700bp     |
|           | AAGTAGAGGCAGCAACCA   | F | ~560bp  |            |
| AT3G25880 | CACACTTGCACAATTCTC   | F |         |            |
|           | TGAACTGTAAACCGGAAC   | R | ~2200bp | ~1200bp    |
|           | CCACCAAGGACGAGATTC   | F | ~770bp  |            |
| AT4G10060 | AGAGCCTGACCCTGAACT   | F |         |            |
|           | ATGGCTCCACAACAACAA   | R | ~4000bp | ~700bp     |
|           | TACCCTCCAACCTGCGTGA  | F | ~580bp  |            |
| AT4G35165 | TCCGTGAGTGTCGCTAAT   | F |         |            |
|           | GAATACGCATCCCTGAGT   | R | ~2100bp | ~1700bp    |
|           | GTCGTGCCTTCAAGTCTA   | R | ~1300bp |            |
| AT5G42350 | TCTGGAGCTGGTAATGAA   | F |         |            |
|           | TCAGTGGCACCAACAATG   | R | ~2400bp | ~1400bp    |
|           | GACTACATCAGCGCCTTA   | R | ~1100bp |            |
| AT5G48175 | TCTTCAGCGACAGCCGAT   | F |         |            |
|           | GGCTAGTGAACAGTGGAA   | R | ~2300bp | ~1200bp    |
|           | TGGAAACAGGATACTCAC   | R | ~250bp  |            |
| AT2G23985 | GCCACAAGTATCGAACAT   | F |         |            |
|           | CAGGGCCTTACTACTTCA   | R | ~3000bp | ~1400bp or |
|           | AACAAGGGCGATGAGGAT   | F | ~900bp  | ~2400bp    |
| AT2G01360 | CCTTGGAATTGCGTAGAA   | F |         |            |
|           | CAGAGTTGGAGCATGGTT   | R | ~1700bp | ~1000bp    |

|           |                     |   |         |           |
|-----------|---------------------|---|---------|-----------|
|           | TGCTTACACTGCGCTGAT  | F | ~700bp  |           |
| AT4G29710 | CGTAGTTCACCGTCATCA  | F |         |           |
|           | GTTTGGGCTACATTCAGA  | R | ~1600bp | ~600bp    |
|           | AAAGTCCACTGGGTCATA  | R | ~200bp  |           |
| AT5G65050 | CCGTACCCGAGTCATATT  | F |         |           |
|           | TCTAGGGTTCTTCACGCT  | R | ~4400bp | ~400bp    |
|           | ACAGAAGCTCATGCGAAA  | F | ~160bp  |           |
| AT4G06490 | TCCCGACTATGCTCCGTA  | F |         |           |
|           | CTCAACGTGCATGGACTT  | R | ~1500bp | ~800bp    |
|           | TTCCGAGCTGCCTATGTA  | F | ~450bp  |           |
| AT5G38670 | GACGGTTGTGAGGACGAA  | F |         |           |
|           | ACGTGTGAGACCGGCAAT  | R | ~2300bp | ~800bp    |
|           | TCCGGTGAAGCTATGAGA  | R | ~500bp  |           |
| AT1G52440 | CTAGGTCTGGTTGCACAT  | F |         |           |
|           | AGGTGGAGACTGGAGCAT  | R | ~2700bp | ~400bp or |
|           | CGTCAAGTTCACACCATT  | F | ~800bp  | ~1200bp   |
| AT2G29920 | CAGGTCATTTCCGGTCTAT | F |         |           |
|           | CTGTATTGCTGTTGCTGA  | R | ~2000bp | ~900bp    |
|           | CCAATGGAAGGAACTGTT  | R | ~660bp  |           |
| AT5G26912 | TCGACCACCGTTTAGTAT  | F |         |           |
|           | GTTGGCATAACCGAGATAA | R | ~800bp  | ~360bp    |
|           | AACCCTCGACAAGTAGAT  | F | ~200bp  |           |
| AT2G28426 | GGACGTGAAATTCGGCAA  | F |         |           |
|           | TGAACCTGCGATTGAGTA  | R | ~800bp  | ~500bp    |
|           | CAGCGAGATTCAACACAA  | R | ~350bp  |           |
| AT4G38280 | CGCTCCTCCGATTGATTA  | F |         |           |
|           | TGAACGCACCAGCAACTA  | R | ~2000bp | ~800bp    |
|           | GCTGCTTTGGATGTGTCA  | R | ~300bp  |           |
| AT5G18880 | GAAGGTCCAATCAGCATC  | F |         |           |
|           | CGTAGTCGATATGCAGA   | R | ~1900bp | ~800bp    |
|           | ATCCGTCCAGGCATCATA  | F | ~550bp  |           |
| AT1G02590 | CGATTCCGGTTAAGACTA  | F |         |           |
|           | CGAACCATCACAGCTATT  | R | ~1400bp | ~800bp    |
|           | GAAGATTGAAGCTGCTGC  | R | ~200bp  |           |
| AT3G11060 | GTTATCGACAAGCTGCAA  | F |         |           |
|           | CCTTCGTATCCGTTTCACT | R | ~1800bp | ~1000bp   |
|           | CGAAACGCTTGTCTGATT  | R | ~250bp  |           |
| AT2G24617 | CGGTGTGCAAAGAGAAGT  | F |         |           |
|           | GTGGTATGGGTTGCGAAT  | R | ~1000bp | ~550bp    |
|           | AGGTGGTTGTACGAGGAA  | R | ~300bp  |           |
| AT5G18010 | GGATCTGAAATTCTCGGT  | F |         |           |
|           | AGGGCACGTCTTATCTCA  | R | ~1000bp | ~800bp    |
|           | AGTTTGGGTTTGCTCATC  | R | ~500bp  |           |
| AT5G26270 | GGTTATCGGTGACAGTGA  | F |         |           |

|           |                     |   |         |         |
|-----------|---------------------|---|---------|---------|
|           | TGGATGGACTTATGGACA  | R | ~2600bp | ~2000bp |
|           | CTCTTGTGTTACGTTGGA  | F | ~800bp  |         |
| AT5G26950 | GTCCTTCGCTGTCACACT  | F |         |         |
|           | GTGCAGACAACCAAGATT  | R | ~2000bp | ~1000bp |
|           | GGATCTGGTCTGGGAAGT  | R | ~800bp  |         |
| AT1G59920 | ACCACGCACTTCGAGATT  | F |         |         |
|           | GCGTCTAAGCCAATTTCT  | R | ~1700bp | ~700bp  |
| AT1G43680 | CCGATGGTTTTAGGTACT  | F |         |         |
|           | GTAACAACCTCCACCCTAT | R | ~2100bp | ~1100bp |
|           | ACGTATTCACCTCTGCAT  | F | ~400bp  |         |
| AT2G34320 | AATGATGTGTTGCGATAA  | F |         |         |
|           | CCTACTCGGCCAATTCTA  | R | ~1800bp | ~800bp  |
|           | CAGACGCTACATGGCAGT  | F | ~600bp  |         |
| AT5G56690 | GTTATCCCGATTTGGCTA  | F |         |         |
|           | TTGCTCCTCGCTGTAGTA  | R | ~2000bp | ~680bp  |
|           | CGGGTATGATTCTGGTAT  | F | ~340bp  |         |
| AT1G05740 | TCCAGTTGTCAATGCTCA  | F |         |         |
|           | ACCCGACTTTGGACATAA  | R | ~1700bp | ~780bp  |
|           | GCCAAGTTTCAGGTACAA  | F | ~380bp  |         |
| AT1G47497 | TGACCCACCAATCCAGTA  | F |         |         |
|           | GCGGCTATGTGAAGTGAT  | R | ~2200bp | ~1250bp |
|           | GGTTTCAGGAATGCAGAT  | F | ~800bp  |         |
| AT4G18540 | GAATCGCAGTATCGTGAA  | F |         |         |
|           | GTCCACTTGCACATCACA  | R | ~2400bp | ~1000bp |
|           | GAGACGTGTTCTGTTGA   | R | ~580bp  |         |
| AT4G01535 | TACAGCATGATCGGACTT  | F |         |         |
|           | CCGGTGAAGAAGTTATGA  | R | ~2000bp | ~900bp  |
|           | TACCAATGCTTCGGAGTT  | F | ~700bp  |         |
| AT1G48390 | CTGAGATTTGCGGATGAT  | F |         |         |
|           | TTTGCCCTTGCTAGACGTA | R | ~2600bp | ~800bp  |
|           | AGCTTGACAATGGAATCT  | F | ~400bp  |         |
| AT4G09430 | TGGCTAAGAATGCGGTAT  | F |         |         |
|           | GCAGTGACTTGTGCTAA   | R | ~6000bp | ~900bp  |
|           | CACAATTTGGAAGCAGAA  | F | ~550bp  |         |

A three-primer PCR amplification was used in our study. The first two primers are designed in 3'- and 5'-flanking regions and the last one is in the insertion of P/A genes. The present gene has two PCR products by the two pairs of primers while the absent gene has only one because of lacking the insertion region.
