# Supplementary material for: Variation of presence/absence genes among Arabidopsis populations
Source: PubMed Central journal article supplement (PMC3433342; doi:10.1186/1471-2148-12-86), 2012-06-14
Supplement: 1471-2148-12-86-S4.pdf [file 1471-2148-12-86-S4.pdf]

**Table S1.** The 80 accessions used in this study.

| Name   | NASC code | Alternative name | Latitude | Longitude | Country    |
|--------|-----------|------------------|----------|-----------|------------|
| Agu-1  | CS76409   | Agu-1            | 41.32    | -1.3414   | Spain      |
| Bak-2  | CS76392   | Bak-2            | 41.7942  | 43.4767   | Georgia    |
| Bak-7  | CS76393   | Bak-7            | 41.7942  | 43.4767   | Georgia    |
| Cdm-0  | CS76410   | Cdm-0            | 39.7255  | -5.7441   | Spain      |
| Del-10 | CS76397   | Del-10           | 44.9444  | 21.1828   | Yugoslavia |
| Dog-4  | CS76386   | Dog-4            | 38.3011  | 42.2239   | Turkey     |
| Don-0  | CS76411   | Don-0            | 36.8323  | -6.3598   | Spain      |
| Ey15-2 | CS76399   | Ey1.5-2          | 48.4345  | 8.7678    | Germany    |
| Fei-0  | CS76412   | Fei-0            | 40.9233  | -8.5421   | Portugal   |
| HKT2.4 | CS76404   | HKT2-4           | 48.136   | 9.4033    | Germany    |
| ICE1   | CS76373   | Bolin-1          | 44.4604  | 25.7356   | Romania    |
| ICE102 | CS76423   | Galdo-1          | 40.5711  | 15.3215   | Italy      |
| ICE104 | CS76367   | Lago-1           | 39.1776  | 16.2601   | Italy      |
| ICE106 | CS76365   | Mammo-1          | 38.3623  | 16.2304   | Italy      |
| ICE107 | CS76364   | Mammo-2          | 38.3782  | 16.2174   | Italy      |
| ICE111 | CS76361   | Monte-1          | 40.2803  | 15.655    | Italy      |
| ICE112 | CS76363   | Moran-1          | 39.8315  | 16.1726   | Italy      |
| ICE119 | CS76424   | Timpo-1          | 39.2729  | 16.2677   | Italy      |
| ICE120 | CS76425   | Valsi-1          | 40.1763  | 16.4533   | Italy      |
| ICE127 | CS76385   | Kly1             | 51.3391  | 82.5724   | Russia     |
| ICE130 | CS76384   | Kly4             | 51.3184  | 82.5528   | Russia     |
| ICE134 | CS76383   | Koz2             | 51.3284  | 82.185    | Russia     |
| ICE138 | CS76426   | Leb-3            | 51.655   | 80.8151   | Russia     |
| ICE150 | CS76379   | Sij1             | 41.45    | 70.05     | Usbekistan |
| ICE152 | CS76380   | Sij2             | 41.45    | 70.05     | Usbekistan |
| ICE153 | CS76381   | Sij4             | 41.45    | 70.05     | Usbekistan |
| ICE163 | CS76353   | Altenb-2         | 46.3716  | 11.2376   | Italy      |
| ICE169 | CS76357   | Bozen-1          | 46.513   | 11.331    | Italy      |
| ICE173 | CS76358   | Bozen-1          | 46.513   | 11.331    | Italy      |
| ICE181 | CS76354   | Mitterberg-1     | 46.3646  | 11.2835   | Italy      |
| ICE21  | CS76370   | Petro-1          | 44.3386  | 21.4603   | Serbia     |
| ICE212 | CS76355   | Castelfed-4      | 46.3378  | 11.2928   | Italy      |
| ICE213 | CS76356   | Castelfed-4      | 46.3378  | 11.2928   | Italy      |
| ICE216 | CS76351   | Rovero-1         | 46.2543  | 11.167    | Italy      |
| ICE226 | CS76349   | Vezzano-2        | 46.6295  | 10.8161   | Italy      |
| ICE228 | CS76350   | Vezzano-2        | 46.6295  | 10.8161   | Italy      |
| ICE29  | CS76419   | Slavi-1          | 41.4275  | 23.647    | Bulgaria   |
| ICE33  | CS76372   | Jablo-1          | 41.588   | 25.1988   | Bulgaria   |
| ICE36  | CS76369   | Dobra-1          | 44.8373  | 20.1566   | Serbia     |
| ICE49  | CS76347   | Aitba-2          | 31.484   | -7.4499   | Tunisia    |

|           |         |            |         |         |            |
|-----------|---------|------------|---------|---------|------------|
| ICE50     | CS76348 | Toufl-1    | 31.4687 | -7.4166 | Tunisia    |
| ICE60     | CS76377 | Stepn-2    | 54.0857 | 60.4609 | Russia     |
| ICE61     | CS76378 | Stepn-1    | 54.0599 | 60.4789 | Russia     |
| ICE63     | CS76420 | Copac-1    | 46.1088 | 21.9523 | Serbia     |
| ICE7      | CS76371 | Lecho-1    | 41.428  | 23.4993 | Romania    |
| ICE70     | CS76421 | Borsk-2    | 50.0389 | 51.7457 | Russia     |
| ICE71     | CS76375 | Shigu-1    | 53.3328 | 49.4807 | Russia     |
| ICE72     | CS76374 | Shigu-2    | 53.332  | 49.4804 | Russia     |
| ICE73     | CS76376 | Kidr-1     | 51.3071 | 57.5612 | Russia     |
| ICE75     | CS76422 | Krazo-2    | 53.088  | 52.0001 | Russia     |
| ICE79     | CS76352 | Voeran-1   | 46.36   | 11.23   | Italy      |
| ICE91     | CS76362 | Angel-1    | 38.6191 | 16.1678 | Italy      |
| ICE92     | CS76366 | Angit-1    | 38.7631 | 16.2416 | Italy      |
| ICE93     | CS76368 | Apost-1    | 39.0085 | 16.4678 | Italy      |
| ICE97     | CS76359 | Ciste-1    | 41.6156 | 12.8687 | Italy      |
| ICE98     | CS76360 | Ciste-2    | 41.6156 | 12.8687 | Italy      |
| Istisu-1  | CS76389 | Istisu-1   | 38.9786 | 48.5594 | Azerbaijan |
| Kastel-1  | CS76395 | Kastel-1   | 44.6419 | 34.3814 | Ukraine    |
| Koch-1    | CS76396 | Koch-1     | 50.3553 | 29.3244 | Ukraine    |
| Lag2.2    | CS76390 | Lag2-2     | 41.8296 | 46.2831 | Georgia    |
| Leo-1     | CS76413 | Leo-1      | 41.7959 | -3.1147 | Spain      |
| Lerik1-3  | CS76388 | Lerik1-3   | 38.7406 | 48.6131 | Azerbaijan |
| Mer-6     | CS76414 | Mer-6      | 38.9159 | -6.3376 | Spain      |
| Nemrut-1  | CS76398 | Nemrut-1   | 38.6425 | 42.2394 | Turkey     |
| Nie1-2    | CS76402 | Nie1-2     | 48.5179 | 8.8026  | Germany    |
| Ped-0     | CS76415 | Ped-0      | 40.7385 | -3.8978 | Spain      |
| Pre-6     | CS76416 | Pra-6      | 41.0504 | -3.5395 | Spain      |
| Qui-0     | CS76417 | Qui-0      | 42.6918 | -6.9301 | Spain      |
| Rue3-1-31 | CS76406 | Ru3.1-31   | 48.564  | 9.1595  | Germany    |
| Sha       | CS76382 | Sha        | 38.35   | 68.48   | Tajikistan |
| Star-8    | CS76400 | Star-8     | 48.4345 | 8.8167  | Germany    |
| TueSB30-3 | CS76403 | Tu-SB30-3  | 48.5334 | 9.0583  | Germany    |
| Tuescha9  | CS76401 | Tu-Scha-9  | 48.5344 | 9.0503  | Germany    |
| TueV13    | CS76407 | Tu-V-13    | 48.5232 | 9.052   | Germany    |
| TueWa1-2  | CS76405 | Tu-Wa1-2   | 48.5342 | 9.0345  | Germany    |
| Vash-1    | CS76391 | Vash-1     | 41.2381 | 46.3728 | Georgia    |
| Vie-0     | CS76418 | Vie-0      | 42.6266 | 0.7626  | Spain      |
| WalhaesB4 | CS76408 | Wal-HasB-4 | 48.5956 | 9.1855  | Germany    |
| Xan-1     | CS76387 | Xan-1      | 38.6536 | 48.7992 | Azerbaijan |
| Yeg-1     | CS76394 | Yeg-1      | 39.8692 | 45.3622 | Armenia    |
