# Supplementary material for: Variation of presence/absence genes among Arabidopsis populations
Source: PubMed Central journal article supplement (PMC3433342; doi:10.1186/1471-2148-12-86), 2012-06-14
Supplement: 1471-2148-12-86-S6.pdf [file 1471-2148-12-86-S6.pdf]

**Table S3.** Distributions of P/A genes on chromosomes.

| Chromosome | D(Mb) | N <sub>genes</sub> | N <sub>P/A</sub> | P <sub>P/A</sub> | N <sub>c</sub> | P <sub>c</sub> |
|------------|-------|--------------------|------------------|------------------|----------------|----------------|
| Chr 1      | 0.5   | 299                | 13               | 0.0435           | 5              | 0.385          |
|            | 1.5   | 280                | 4                | 0.0143           | 0              | 0              |
|            | 2.5   | 289                | 7                | 0.0242           | 3              | 0.429          |
|            | 3.5   | 281                | 12               | 0.0427           | 0              | 0              |
|            | 4.5   | 290                | 16               | 0.0552           | 8              | 0.5            |
|            | 5.5   | 298                | 13               | 0.0436           | 8              | 0.615          |
|            | 6.5   | 272                | 13               | 0.0478           | 2              | 0.154          |
|            | 7.5   | 250                | 25               | 0.1              | 13             | 0.52           |
|            | 8.5   | 272                | 18               | 0.0662           | 10             | 0.556          |
|            | 9.5   | 253                | 20               | 0.0791           | 9              | 0.45           |
|            | 10.5  | 229                | 20               | 0.0873           | 12             | 0.6            |
|            | 11.5  | 216                | 24               | 0.1111           | 7              | 0.292          |
|            | 12.5  | 183                | 44               | 0.2404           | 12             | 0.273          |
|            | 13.5  | 78                 | 25               | 0.3205           | 4              | 0.16           |
|            | 14.5  | 21                 | 8                | 0.381            | 0              | 0              |
|            | 15.5  | 17                 | 7                | 0.4118           | 0              | 0              |
|            | 16.5  | 103                | 27               | 0.2621           | 4              | 0.148          |
|            | 17.5  | 203                | 25               | 0.1232           | 8              | 0.32           |
|            | 18.5  | 243                | 19               | 0.0782           | 4              | 0.211          |
|            | 19.5  | 258                | 32               | 0.124            | 7              | 0.219          |
|            | 20.5  | 273                | 17               | 0.0623           | 6              | 0.353          |
|            | 21.5  | 203                | 36               | 0.1773           | 15             | 0.417          |
|            | 22.5  | 247                | 43               | 0.1741           | 27             | 0.628          |
|            | 23.5  | 249                | 38               | 0.1526           | 23             | 0.605          |
|            | 24.5  | 251                | 25               | 0.0996           | 11             | 0.44           |
|            | 25.5  | 232                | 10               | 0.0431           | 2              | 0.2            |
|            | 26.5  | 264                | 9                | 0.0341           | 2              | 0.222          |
|            | 27.5  | 285                | 21               | 0.0737           | 7              | 0.333          |
|            | 28.5  | 268                | 6                | 0.0224           | 2              | 0.333          |
|            | 29.5  | 260                | 11               | 0.0423           | 1              | 0.091          |
| 30.5       | 132   | 5                  | 0.0379           | 0                | 0              |                |
| Chr 2      | 0.5   | 223                | 28               | 0.126            | 9              | 0.321          |
|            | 1.5   | 185                | 37               | 0.2              | 14             | 0.378          |
|            | 2.5   | 74                 | 24               | 0.324            | 4              | 0.167          |
|            | 3.5   | 83                 | 19               | 0.229            | 0              | 0              |
|            | 4.5   | 44                 | 27               | 0.614            | 3              | 0.111          |
|            | 5.5   | 77                 | 34               | 0.442            | 6              | 0.176          |
|            | 6.5   | 137                | 38               | 0.277            | 7              | 0.184          |
|            | 7.5   | 235                | 18               | 0.077            | 6              | 0.333          |
|            | 8.5   | 269                | 24               | 0.089            | 6              | 0.25           |

|       |      |     |    |       |    |       |
|-------|------|-----|----|-------|----|-------|
|       | 9.5  | 268 | 18 | 0.067 | 5  | 0.278 |
|       | 10.5 | 234 | 23 | 0.098 | 6  | 0.261 |
|       | 11.5 | 244 | 19 | 0.078 | 8  | 0.421 |
|       | 12.5 | 242 | 18 | 0.074 | 6  | 0.333 |
|       | 13.5 | 277 | 13 | 0.047 | 5  | 0.385 |
|       | 14.5 | 289 | 16 | 0.055 | 3  | 0.188 |
|       | 15.5 | 271 | 7  | 0.026 | 2  | 0.286 |
|       | 16.5 | 277 | 12 | 0.043 | 3  | 0.25  |
|       | 17.5 | 273 | 10 | 0.037 | 4  | 0.4   |
|       | 18.5 | 307 | 16 | 0.052 | 5  | 0.313 |
|       | 19.5 | 199 | 4  | 0.02  | 2  | 0.5   |
| Chr 3 | 0.5  | 329 | 9  | 0.027 | 2  | 0.04  |
|       | 1.5  | 296 | 10 | 0.034 | 1  | 0.014 |
|       | 2.5  | 297 | 7  | 0.024 | 2  | 0.024 |
|       | 3.5  | 308 | 16 | 0.052 | 5  | 0.039 |
|       | 4.5  | 267 | 11 | 0.041 | 6  | 0.06  |
|       | 5.5  | 294 | 7  | 0.024 | 2  | 0.044 |
|       | 6.5  | 274 | 10 | 0.036 | 1  | 0.047 |
|       | 7.5  | 270 | 19 | 0.07  | 3  | 0.093 |
|       | 8.5  | 236 | 15 | 0.064 | 5  | 0.076 |
|       | 9.5  | 263 | 26 | 0.099 | 12 | 0.076 |
|       | 10.5 | 210 | 42 | 0.2   | 14 | 0.095 |
|       | 11.5 | 107 | 40 | 0.374 | 4  | 0.224 |
|       | 12.5 | 33  | 27 | 0.818 | 1  | 1.333 |
|       | 13.5 | 28  | 25 | 0.893 | 9  | 0.893 |
|       | 14.5 | 44  | 26 | 0.591 | 0  | 0.182 |
|       | 15.5 | 116 | 54 | 0.466 | 6  | 0.06  |
|       | 16.5 | 203 | 66 | 0.325 | 20 | 0.133 |
|       | 17.5 | 238 | 31 | 0.13  | 13 | 0.105 |
|       | 18.5 | 277 | 14 | 0.051 | 5  | 0.069 |
|       | 19.5 | 306 | 13 | 0.042 | 3  | 0.105 |
|       | 20.5 | 281 | 10 | 0.036 | 4  | 0.06  |
|       | 21.5 | 291 | 20 | 0.069 | 11 | 0.124 |
|       | 22.5 | 276 | 19 | 0.069 | 4  | 0.156 |
|       | 23.5 | 152 | 11 | 0.072 | 3  | 0.25  |
| Chr 4 | 0.5  | 264 | 27 | 0.102 | 14 | 0.519 |
|       | 1.5  | 173 | 31 | 0.179 | 6  | 0.194 |
|       | 2.5  | 136 | 21 | 0.154 | 3  | 0.143 |
|       | 3.5  | 9   | 3  | 0.333 | 1  | 0.333 |
|       | 4.5  | 31  | 22 | 0.71  | 0  | 0     |
|       | 5.5  | 128 | 29 | 0.227 | 5  | 0.172 |
|       | 6.5  | 224 | 36 | 0.161 | 11 | 0.306 |
|       | 7.5  | 239 | 27 | 0.113 | 10 | 0.37  |

|       |      |     |    |       |    |       |
|-------|------|-----|----|-------|----|-------|
|       | 8.5  | 256 | 28 | 0.109 | 16 | 0.571 |
|       | 9.5  | 249 | 20 | 0.08  | 11 | 0.55  |
|       | 10.5 | 256 | 27 | 0.105 | 8  | 0.296 |
|       | 11.5 | 268 | 25 | 0.093 | 10 | 0.4   |
|       | 12.5 | 275 | 19 | 0.069 | 9  | 0.474 |
|       | 13.5 | 303 | 5  | 0.017 | 2  | 0.4   |
|       | 14.5 | 277 | 14 | 0.051 | 4  | 0.286 |
|       | 15.5 | 265 | 8  | 0.03  | 2  | 0.25  |
|       | 16.5 | 299 | 12 | 0.04  | 3  | 0.25  |
|       | 17.5 | 269 | 14 | 0.052 | 3  | 0.214 |
|       | 18.5 | 176 | 6  | 0.034 | 1  | 0.167 |
| Chr 5 | 0.5  | 296 | 14 | 0.047 | 6  | 0.429 |
|       | 1.5  | 291 | 12 | 0.041 | 4  | 0.333 |
|       | 2.5  | 291 | 3  | 0.01  | 0  | 0     |
|       | 3.5  | 279 | 9  | 0.032 | 3  | 0.333 |
|       | 4.5  | 272 | 2  | 0.007 | 1  | 0.5   |
|       | 5.5  | 291 | 22 | 0.076 | 8  | 0.364 |
|       | 6.5  | 276 | 14 | 0.051 | 7  | 0.5   |
|       | 7.5  | 246 | 15 | 0.061 | 1  | 0.067 |
|       | 8.5  | 221 | 20 | 0.09  | 8  | 0.4   |
|       | 9.5  | 204 | 30 | 0.147 | 9  | 0.3   |
|       | 10.5 | 88  | 32 | 0.364 | 7  | 0.219 |
|       | 11.5 | 18  | 12 | 0.667 | 0  | 0     |
|       | 12.5 | 26  | 16 | 0.615 | 0  | 0     |
|       | 13.5 | 86  | 19 | 0.221 | 5  | 0.263 |
|       | 14.5 | 172 | 26 | 0.151 | 8  | 0.308 |
|       | 15.5 | 233 | 53 | 0.227 | 37 | 0.698 |
|       | 16.5 | 276 | 24 | 0.087 | 10 | 0.417 |
|       | 17.5 | 249 | 43 | 0.173 | 15 | 0.349 |
|       | 18.5 | 234 | 34 | 0.145 | 11 | 0.324 |
|       | 19.5 | 281 | 25 | 0.089 | 9  | 0.36  |
|       | 20.5 | 256 | 11 | 0.043 | 1  | 0.091 |
|       | 21.5 | 272 | 14 | 0.051 | 4  | 0.286 |
|       | 22.5 | 289 | 15 | 0.052 | 6  | 0.4   |
|       | 23.5 | 285 | 6  | 0.021 | 1  | 0.167 |
|       | 24.5 | 281 | 18 | 0.064 | 12 | 0.667 |
|       | 25.5 | 307 | 5  | 0.016 | 1  | 0.2   |
|       | 26.5 | 284 | 13 | 0.046 | 4  | 0.308 |

D represents the physical distance (Mb) on the chromosome. In this column, the number is the central position of this chromosomal section.  $N_{\text{genes}}$  represents the total gene number for each 1 Mb section.  $N_{P/A}$  and  $P_{P/A}$  represent the number and

proportion of P/A genes in this section.  $N_c$  is the number of clustered P/A genes and  $P_c$  is the proportion, equal to  $N_c$  divided by  $N_{P/A}$ .
