# Supplementary material for: Variation of presence/absence genes among Arabidopsis populations
Source: PubMed Central journal article supplement (PMC3433342; doi:10.1186/1471-2148-12-86), 2012-06-14
Supplement: 1471-2148-12-86-S7.pdf [file 1471-2148-12-86-S7.pdf]

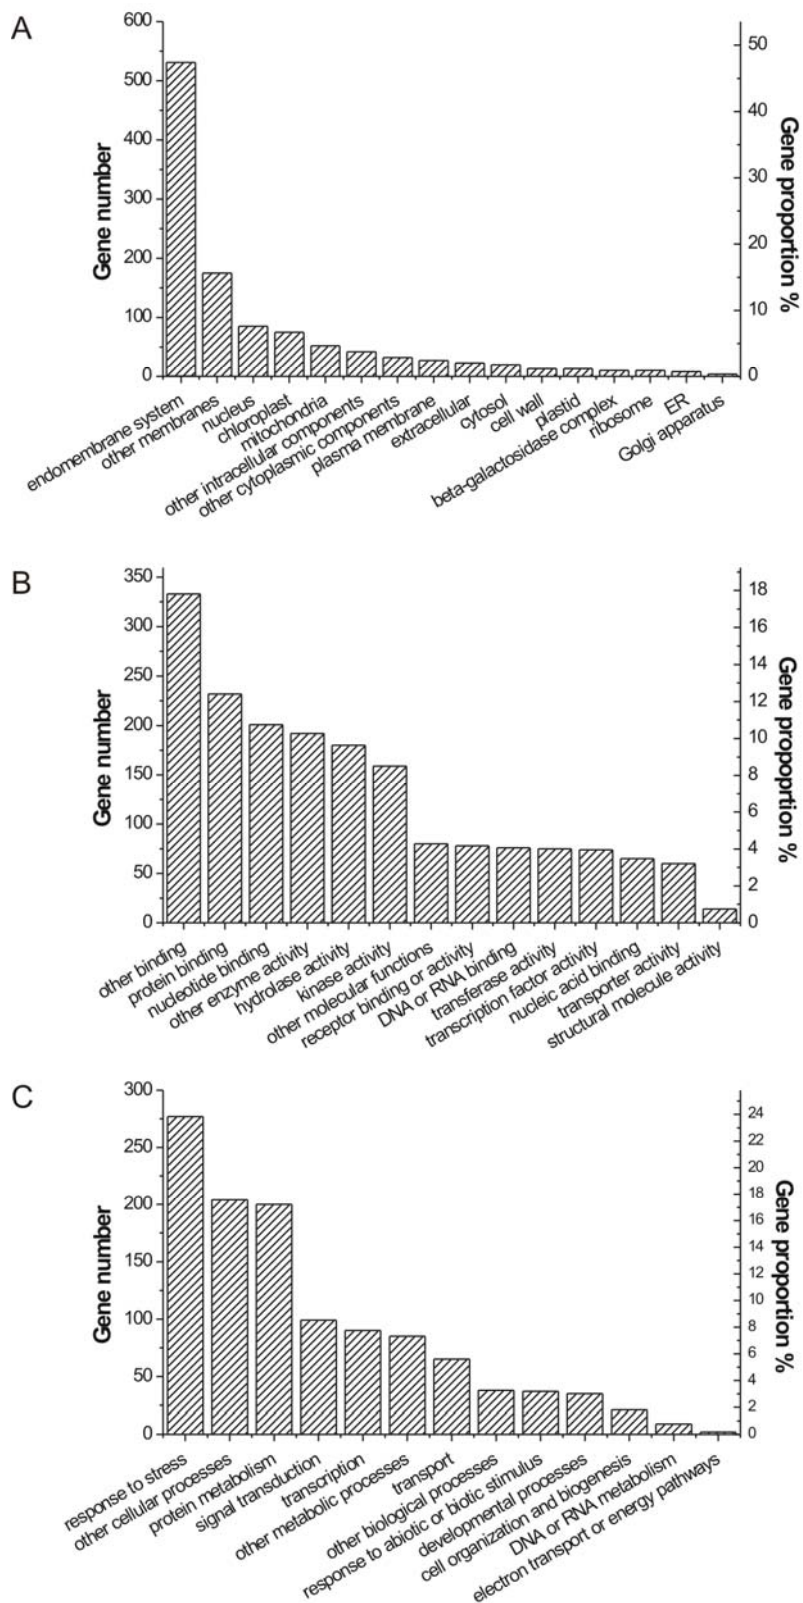

**Figure S3.** GO categories of P/A genes. The number and proportion of P/A genes in three categories, cellular component (A), molecular function (B) and biological

process (C).
