# Supplementary material for: Variation of presence/absence genes among Arabidopsis populations
Source: PubMed Central journal article supplement (PMC3433342; doi:10.1186/1471-2148-12-86), 2012-06-14
Supplement: 1471-2148-12-86-S8.pdf [file 1471-2148-12-86-S8.pdf]

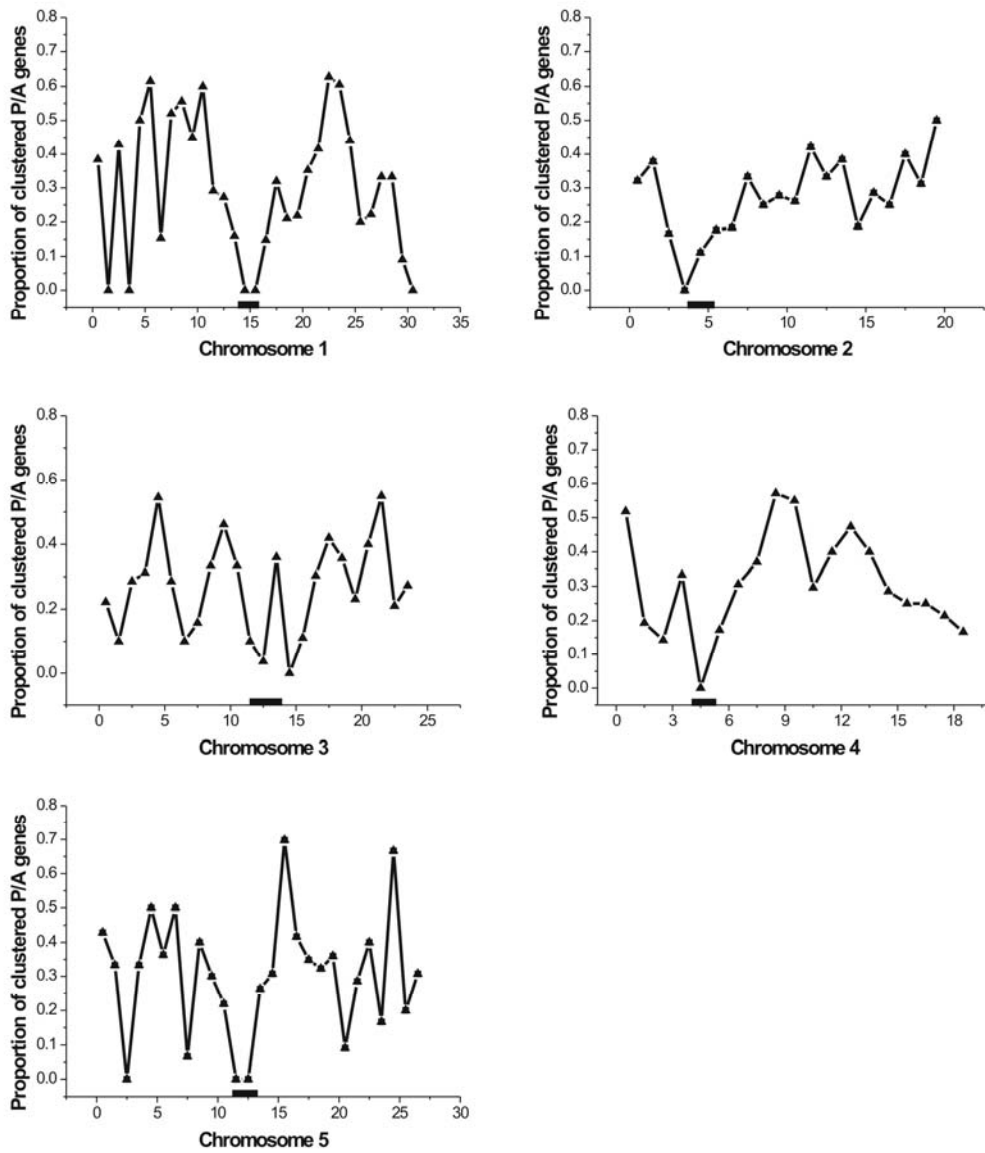

**Figure S2.** Distributions of clustered P/A genes on chromosomes. The x-axis represents the physical distance (Mb) on the chromosome. The y-axis represents the proportion of clustered P/A genes (number of clustered P/A genes divided by total P/A genes) for each Mb of chromosomal length. The thick black bar represents the centromeric region.
